# Supplementary material for: Metal-based anti-diabetic drugs: advances and challenges
Source: Royal Society of Chemistry journal article supplement (doi:10.1039/c1dt10380f), 2011-01-01
Supplement: c1dt10380f.pdf [file c1dt10380f.pdf]

## **Metal-Based Anti-diabetic Drugs: Advances and Challenges<sup>†</sup>**

Aviva Levina,<sup>a</sup> and Peter A. Lay<sup>a</sup>

Supporting Information

**Table S1.** Main types of drugs used in the treatment of human type 2 diabetes.<sup>21, 22, 24</sup>

| <b>Drug type<sup>a</sup></b> | <b>Clinical status<sup>b</sup></b> | <b>Representatives</b>      | <b>Mode of action</b>                                          | <b>Dose,<sup>c</sup><br/>mg/day</b> | <b>Main side effects</b>       | <b>Refs.</b> |
|------------------------------|------------------------------------|-----------------------------|----------------------------------------------------------------|-------------------------------------|--------------------------------|--------------|
| Biguanides                   | 1957                               | metformin                   | increasing insulin-independent glucose metabolism in the liver | 1000-2000                           | GI discomfort                  | 27-29        |
| Thiazolidine-diones          | 1997                               | rosiglitazone, pioglitazone | increasing glucose metabolism in fat tissue                    | 2-30                                | weight gain, fluid retention   | 30, 31       |
| Sulfonylureas                | 1946                               | glibenclamide, glimepiride  | stimulating insulin production in the pancreas                 | 1-10                                | hypoglycaemia, weight gain     | 32, 33       |
| DPP-4 inhibitors             | 2006                               | sitagliptin                 | stimulating insulin production in the pancreas                 | 100                                 | GI discomfort                  | 34-36        |
| GLP-1 agonists               | 2005                               | exenatide                   | stimulating insulin production in the pancreas                 | 0.010 <sup>d</sup>                  | nausea, pancreatitis           | 37-39        |
| Glucosidase inhibitors       | 1995                               | acarbose                    | delaying glucose absorption from the small intestine           | 25-100                              | GI discomfort                  | 40-42        |
| Dopamine receptor agonists   | 2008                               | bromocriptine               | activating general glucose metabolism though CNS action        | 2-5                                 | nausea, reduced blood pressure | 43           |
| SGLT2 inhibitors             | phase III trials                   | dapagliflozin               | decreasing glucose re-absorption in the kidneys                | 10-20                               | urogenital infections          | 44           |

<sup>a</sup> Abbreviations: DPP-4 = dipeptyl peptidase IV; GLP-1 = glucagon-like peptide 1; SGLT2 = sodium glucose co-transporter 2; CNS = central nervous system; GI = gastrointestinal. <sup>b</sup> The year of approval for clinical use in the USA for each type of drugs (not necessarily for the representative compounds).<sup>21, 24</sup> <sup>c</sup> Typical daily doses.<sup>24</sup> Unless stated otherwise, the drugs are administered orally.

<sup>d</sup> Administered by subcutaneous injection.<sup>24</sup>

**Table S2.** Typical anti-diabetic activities of metal- and non-metal-based drugs in animal models

| Model <sup>a</sup> | Compound <sup>b</sup>                                                    | Time, days | Total dose, mmol kg <sup>-1c</sup> | Glucose, mM <sup>d</sup> |                     | Additional observations <sup>e</sup>      | Ref. |
|--------------------|--------------------------------------------------------------------------|------------|------------------------------------|--------------------------|---------------------|-------------------------------------------|------|
|                    |                                                                          |            |                                    | Vehicle                  | Drug                |                                           |      |
| STZ rats           | Metformin                                                                | 42         | 25                                 | 21 ± 3                   | 12 ± 1              | ↓HbA1c; ↑glucose tolerance                | 60   |
| STZ rats           | Na <sub>3</sub> [V <sup>V</sup> O <sub>4</sub> ]                         | 42         | 23                                 | 20.2 ± 0.1               | 8.7 ± 0.4           | improves cardiac function                 | 58   |
| STZ rats           | <b>1a</b> ([V <sup>IV</sup> O(ma) <sub>2</sub> ])                        | 28         | 10.4                               | 23.2 ± 1.5               | 7.0 ± 0.8           | no change in Ins, Ch, and TG              | 61   |
| STZ rats           | <b>4</b>                                                                 | 17         | 1.35                               | 23 ± 2                   | 12 ± 2              | ↓FFA; ↓TG                                 | 88   |
| STZ rats           | Na <sub>2</sub> [Mo <sup>VI</sup> O <sub>4</sub> ]                       | 42         | 5.5                                | 23.2 ± 1.5               | 13.2 ± 1.4          | ↓BW; ↓FFA; improves cardiac function      | 154  |
| STZ rats           | [Mo <sup>VI</sup> O <sub>2</sub> (ma) <sub>2</sub> ]                     | 42         | 6.3                                | 23.2 ± 1.5               | 16.3 ± 1.3          | ↓BW; ↓FFA                                 | 154  |
| ZDF rats           | Metformin                                                                | 42         | 302                                | 12.6 ± 1.4               | 7.0 ± 0.3           | ↓BW; ↓ Ins; ↓FFA; ↓TG                     | 67   |
| ZDF rats           | Rosiglitazone                                                            | 42         | 0.42                               | 28 ± 3                   | 7 ± 1               | ↑ Ins sensitivity                         | 64   |
| ZDF rats           | Na <sub>3</sub> V <sup>V</sup> O <sub>4</sub> + tea extract <sup>f</sup> | 105        | 21                                 | 25.0 ± 0.3               | 10 ± 1              | ↑ Ins; ↑ TG                               | 65   |
| ZDF rats           | <b>1a</b>                                                                | 42         | 5.5                                | 28 ± 3                   | 7 ± 1               | ↑ Ins sensitivity; activates Ins receptor | 64   |
| ZDF rats           | <b>6</b> ([Cr <sup>III</sup> (pa) <sub>3</sub> ])                        | 48         | 0.37                               | 32 ± 2                   | 29 ± 2 <sup>g</sup> | ↓ HbA1c; ↓ lipid peroxidn.                | 139  |

Table 3 (end)

| Model <sup>a</sup>    | Compound <sup>b</sup>                             | Time, days | Total dose, mmol kg <sup>-1c</sup> | FPG, mM <sup>d</sup> |                         | Additional observations <sup>e</sup>        | Ref.       |
|-----------------------|---------------------------------------------------|------------|------------------------------------|----------------------|-------------------------|---------------------------------------------|------------|
|                       |                                                   |            |                                    | Vehicle              | Drug                    |                                             |            |
| ZDF rats              | Cr(III) dinicocysteinate                          | 48         | 0.37                               | 32 ± 2               | 23 ± 2                  | ↓ HbA1c; ↓ lipid peroxidn.                  | 139        |
| ZDF rats              | <b>7</b>                                          | 126        | 2.4                                | 14.5 ± 2.1           | 13.0 ± 2.0 <sup>g</sup> | ↑ Ins sensitivity; ↓ Ch; ↓ TG               | 151        |
| ZDF rats              | Na <sub>2</sub> [W <sup>VI</sup> O <sub>4</sub> ] | 60         | ~37 <sup>h</sup>                   | 25 ± 3               | 11 ± 1                  | ↑ gluc. tol.; ↓ TG; improves liver function | 155        |
| KKA <sup>y</sup> mice | <b>1c</b>                                         | 28         | 1.6-3.8                            | 24 ± 3               | 12 ± 2                  | ↓ blood pressure                            | 77         |
| KKA <sup>y</sup> mice | <b>8</b>                                          | 24         | 5.5                                | 27 ± 2               | 12 ± 2                  | ↓ HbA1c; ↓ Ins; ↓ leptin                    | 163<br>164 |
| KKA <sup>y</sup> mice | <b>9</b>                                          | 28         | 7.9                                | 28 ± 3               | 13 ± 3                  | ↓ HbA1c; ↓ Ins                              | 165        |

<sup>a</sup> Streptozotocin-(STZ)-induced animal models of diabetes develop type 1 diabetes due to the destruction of β-cells in the pancreas.<sup>59</sup> Zucker diabetic fatty (ZDF) rats are an animal model in which diabetes develops in obese homozygous males (but not in their lean littermates) at over 10 weeks of age due to a mutation in a single gene.<sup>66</sup> KKA<sup>y</sup> mice are used as an animal model in which type 2 diabetic traits are inherited by polygenes and are present in the latent form since the early age.<sup>76</sup> <sup>b</sup> Designations of the complexes (**1-9**) correspond to Chart 1; ma = maltolato(-); pa = 2-pyridinecarboxylato(-). <sup>c</sup> Total dose per kg of body weight received during the treatment (calculated in mmol of metal ion in the case of polynuclear complexes such as **4** or **7**). Unless stated otherwise, the drugs were delivered daily by oral gavage or with food or in drinking water. <sup>d</sup> Average fed plasma glucose (FPG) levels and standard deviations at the end of the treatment. Vehicle-treated diabetic animals were used as age-matched controls. Typical plasma glucose levels for age-matched non-diabetic animals (both vehicle- and drug-treated) were 7 ± 1 mM (not shown in the table). <sup>e</sup> Designations: HbA1c = glycated hemoglobin levels; gluc. tol. = glucose tolerance (rate of glucose clearance following glucose challenge); BW = body weight; Ins, Ch, TG and FFA are plasma levels of insulin, cholesterol, triglycerides and free fatty acids, respectively.

<sup>f</sup> Dissolution of vanadate in black tea extract instead of water greatly reduced the gastrointestinal inflammation caused by the treatment.<sup>65</sup> <sup>g</sup> Not significantly different ( $p > 0.05$ ) compared with the vehicle-treated animals.<sup>139, 151</sup> <sup>h</sup> The drug was delivered in drinking water (2.0 mg Na<sub>2</sub>[WO<sub>4</sub>] per mL).<sup>155</sup> The calculated dose is based on the average water uptake (~30 mL)<sup>64</sup> and average weight (~300 g)<sup>155</sup> of treated diabetic ZDF rats.

**Table S3.** Typical acute glucose-lowering activities of metal complexes in animal models

| Compound <sup>a</sup>                 | Model <sup>b</sup>         | Dose, <sup>c</sup><br>mmol kg <sup>-1</sup> | Time, <sup>d</sup><br>h | Glucose, <sup>e</sup> mM |         | Ref.    |
|---------------------------------------|----------------------------|---------------------------------------------|-------------------------|--------------------------|---------|---------|
|                                       |                            |                                             |                         | Baseline                 | Treatm. |         |
| <b>1a,b</b>                           | STZ rats                   | 0.60 o. g.                                  | 24                      | 22 ± 1                   | 9 ± 1   | 62      |
| <b>1a</b>                             | STZ rats                   | 0.10 i. p.                                  | 24                      | 25 ± 2                   | 11 ± 4  | 62, 71  |
| <b>2</b>                              | STZ rats                   | 0.10 i. p.                                  | 8-12                    | 25 ± 2                   | 11 ± 4  | 71      |
| <b>3</b>                              | non-diabetic<br>or BB rats | 0.0060 i. v.                                | 0.5-1.0                 | decrease by ~30%         |         | 87, 241 |
| <b>5</b>                              | STZ rats                   | 0.0050 o. g.                                | 6                       | decrease by 6-10 mM      |         | 92      |
| [V <sup>IV</sup> O(pa) <sub>2</sub> ] | STZ mice                   | 0.20 i. p.                                  | 12                      | 27 ± 5                   | 15 ± 5  | 169     |
| [Cu(pa) <sub>2</sub> ]                | STZ mice                   | 0.047 i. p.                                 | 12                      | 27 ± 5                   | 10 ± 2  | 169     |

<sup>a</sup> Structures of the complexes **1a,b**, **2**, **3** and **5** are shown in Chart 1; pa = 2-pyridinecarboxylato. <sup>b</sup> Streptozotocin-(STZ)-induced animal models of diabetes develop type 1 diabetes due to the destruction of β-cells in the pancreas; and BB rats are genetically type 1 diabetic animals.<sup>59</sup> <sup>c</sup> Single dose (in mmol metal per kg body weight). Administration routes: o. g. = oral gavage; i. p. = intraperitoneal injection; i. v. = intravenous injection. <sup>d</sup> Time after the drug administration in which maximal activity is achieved. <sup>e</sup> Average values and standard deviations for plasma glucose (in the fed state).

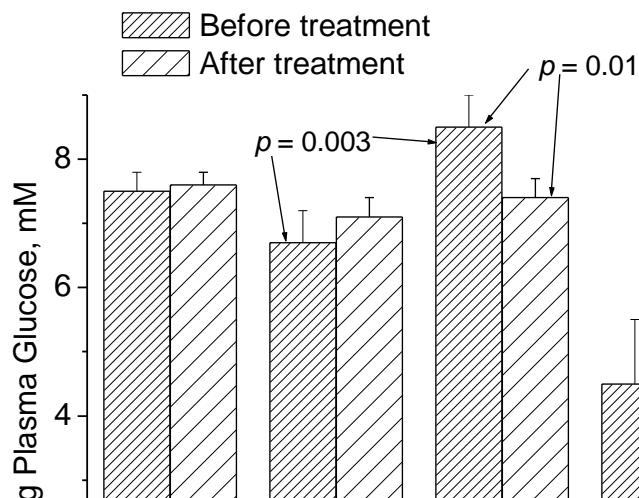

**Figure S1.** Changes in fasting plasma glucose (PG) levels observed in human clinical trials of Cr(III) picolinate (**6** in Chart 1) for type 2 diabetes.<sup>115</sup> Patients were treated either with **6** (1.0 mg Cr per day,  $n = 70$ ) or with placebo ( $n = 67$ ) for 24 weeks.<sup>115</sup> Responders to the Cr treatment ( $n = 32$ ) had significantly higher ( $p = 0.003$ ) initial PG levels than the non-responders ( $n = 38$ ). After the treatment, the PG levels in the responding group significantly decreased ( $p = 0.01$ ), but not to the normal range ( $4.5 \pm 1$  mM),<sup>3</sup> but to the values slightly above those for the non-responding group.<sup>115</sup> Similar differences between Cr-responding and non-responding groups were observed for the glycated hemoglobin levels, glucose clearance rates after challenge, and insulin sensitivity.<sup>115</sup>

## Acknowledgements

We acknowledge the many contributions of our coworkers and collaborators. This research has been supported by the Australian Research Council (Large and Discovery including Professorial Fellowships to PAL, LIEF grants for EPR, vibrational spectroscopy, mass spectrometry, ANBF), the Australian Synchrotron, the Australian Synchrotron Research Program (ASRP) for access to the Australian National Beamline Facility (ANBF) in Tsukuba, Japan, and the Access to Major Facilities Program for access to the Stanford Synchrotron Radiation Lightsource (SSRL), which is operated by the Department of Energy, Office of Basic Energy Sources. The SSRL Biotechnology Program is supported by the National Institutes of Health, National Center for Research Resources, Biomedical Technology Program, and by the Department of Energy, Office of Biological and Environmental Research. The Access to Major Facilities Program funded by the Department of Industry, Science and Resources and managed by the Australian Nuclear Science and Technology Organisation. The ASRP was funded by the Commonwealth of Australia under the Major National Research Facilities program. We also thank the Photon Factory in Tsukuba Japan for access to the ANBF. Use of the Advanced Photon Source at Argonne National Laboratory was supported by the U. S. Department of Energy, Office of Science, Office of Basic Energy Sciences, under Contract No. DE-AC02-06CH11357.
